# Supplementary material
Source: PubMed Central journal article supplement (PMC1895760)
Supplement: blood_2005-07-3068_1.pdf [file blood_2005-07-3068_1.pdf]

| <sup>+</sup> Day   | 0   | 1    | 2   | 3   | 5    | 7   |
|--------------------|-----|------|-----|-----|------|-----|
| Hemoglobin (g/l)   | 48  | 61   | 64  | 84  | 92   | 81  |
| Leukocytes (G/l)   | 1.6 | 1.3  | 1.9 | 1.9 | 2.3  | 3.4 |
| * Neutrophils (%)  | 16  | n.d. | 25  | 27  | 22.5 | 18  |
| “ Blasts (%)       | 51  | n.d. | 42  | 34  | 30   | 25  |
| Thrombocytes (G/l) | 13  | 16   | 34  | 40  | 48   | 54  |
