# Supplementary material
Source: PubMed Central journal article supplement (PMC1895760)
Supplement: blood_2005-07-3068_2.pdf [file blood_2005-07-3068_2.pdf]

|                              | all patients<br>(n=141) | AML-M3<br>(n=18) |
|------------------------------|-------------------------|------------------|
| Age (range)                  | 57 (18-77)              | 53 (28-77)       |
| Leukocytes G/l (range)       | 19.3 (0.3-298)          | 1.1 (0.3-9.6)    |
| Platelets G/l (range)        | 42 (4-283)              | 15 (4-21)        |
| Hemoglobin g/l (range)       | 8.1 (3.8-12.2)          | 6.7 (4.2-8.1)    |
| % peripheral blasts (range)  | 67 (0-98)               | 44 (11-72)       |
| <sup>+</sup> LDH U/l (range) | 870 (356-3488)          | 602 (370-1472)   |
| Sex: male/female             | 61/80                   | 8/10             |
| *Source of blasts: marrow %  | 78                      | 100              |
| blood %                      | 22                      | 0                |
| Karyotype: t(8;21)           | 8                       | 0                |
| inv(16)                      | 15                      | 0                |
| t(15;17)                     | 18                      | 18               |
| +8                           | 7                       | 0                |
| complex                      | 23                      | 0                |
| normal                       | 62                      | 0                |
| “others                      | 15                      | 0                |
| FLT3/ITD                     | 32 / 141 (23%)          | 4 / 18 (22%)     |
