# Supplementary material
Source: PubMed Central journal article supplement (PMC1895760)

fold induction vs. M0  
(Oct-1/GAPDH ratio)

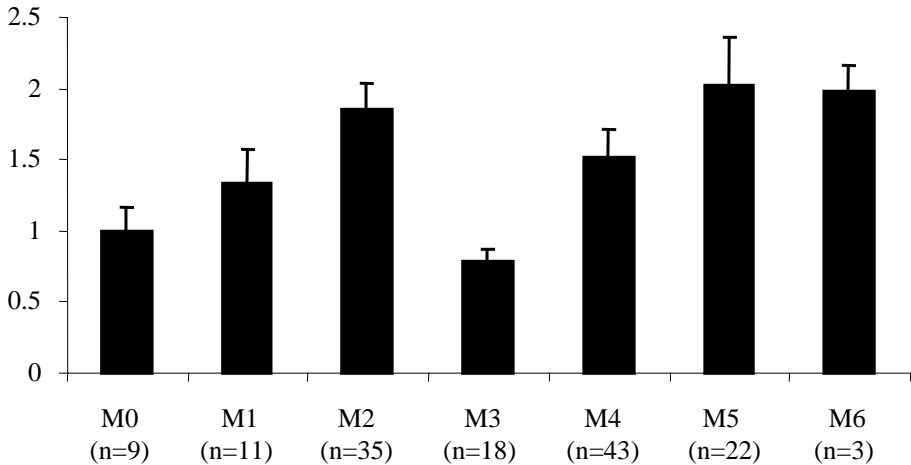

Supplement: blood_2005-07-3068_3.pdf [file blood_2005-07-3068_3.pdf]

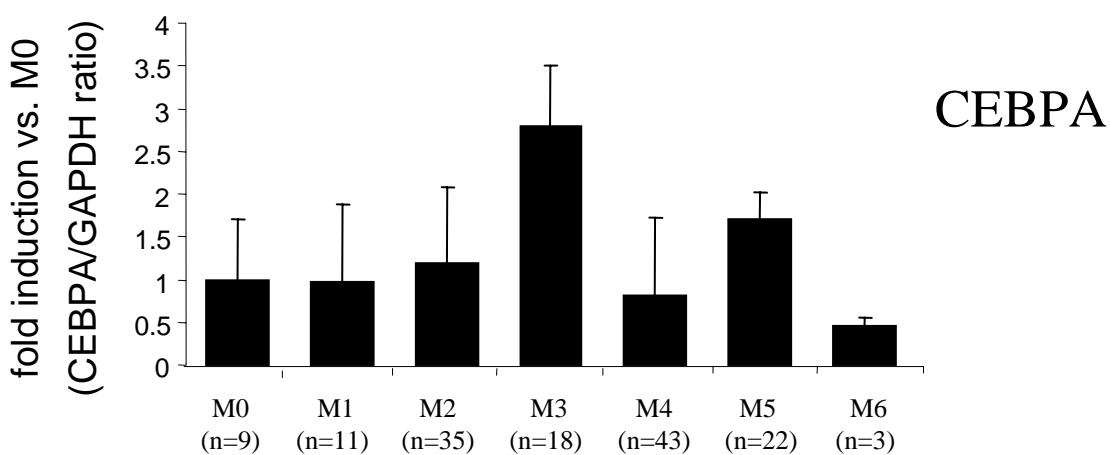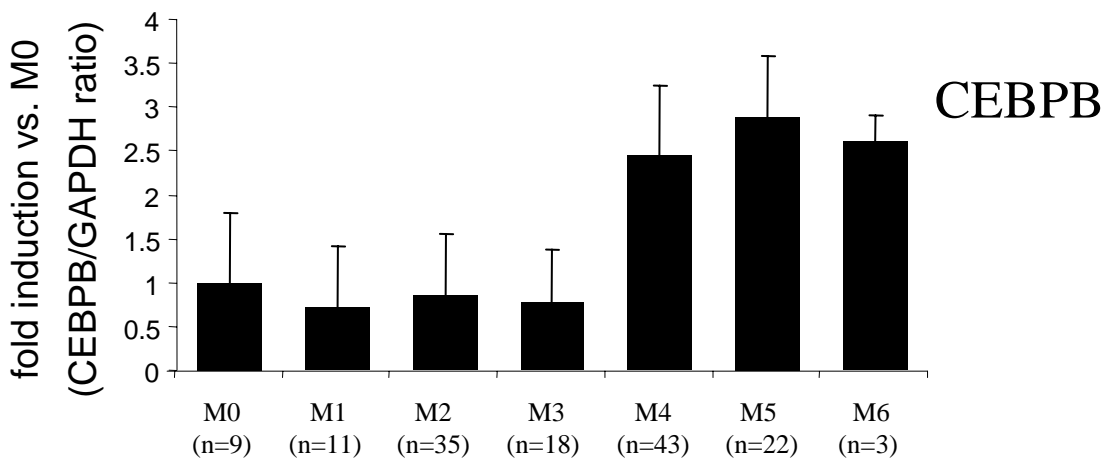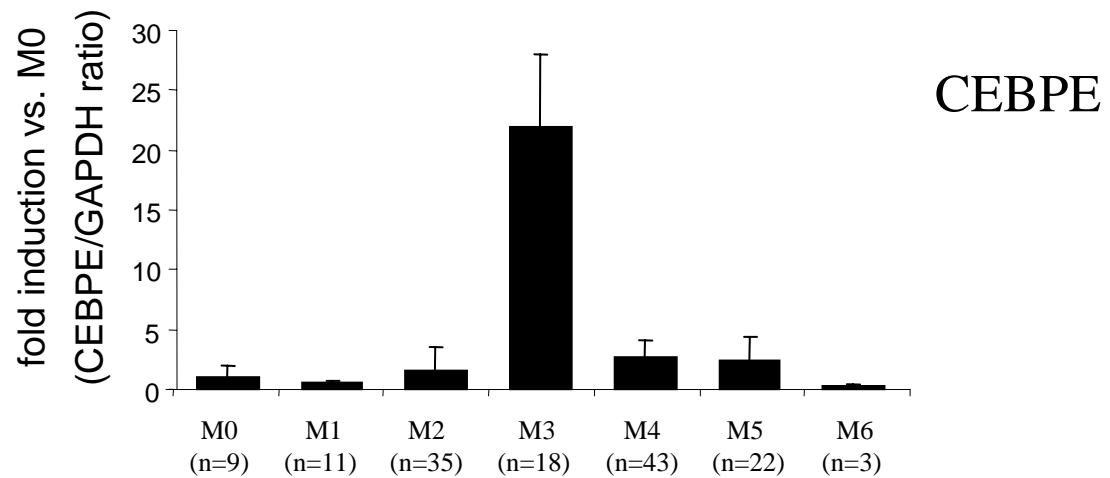

Supplement: blood_2005-07-3068_4.pdf [file blood_2005-07-3068_4.pdf]

HT-PER

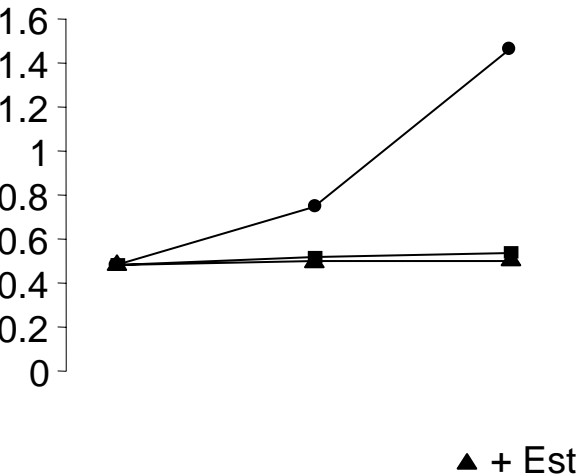

HT-V

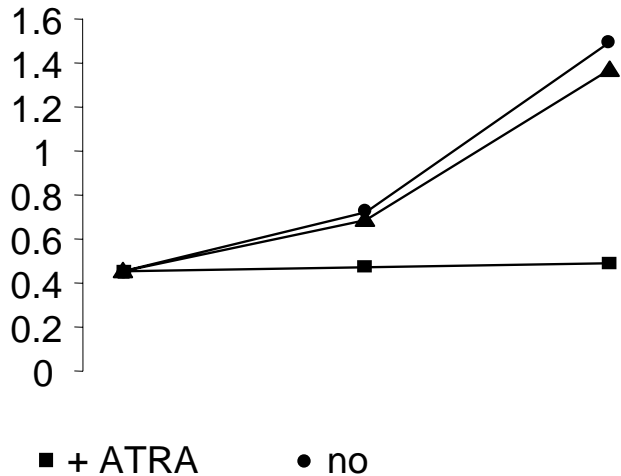

Supplement: blood_2005-07-3068_5.pdf [file blood_2005-07-3068_5.pdf]
